# Supplementary material for: Fine-Mapping the Genetic Association of the Major Histocompatibility Complex in Multiple Sclerosis: HLA and Non-HLA Effects
Source: PLOS journal article supplement (doi:10.1371/journal.pgen.1003926), 2013-11-21

**SNPs**

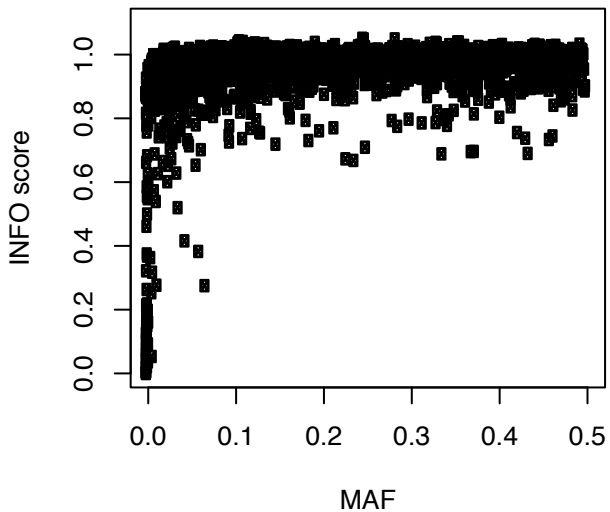

**2 digits HLA alleles**

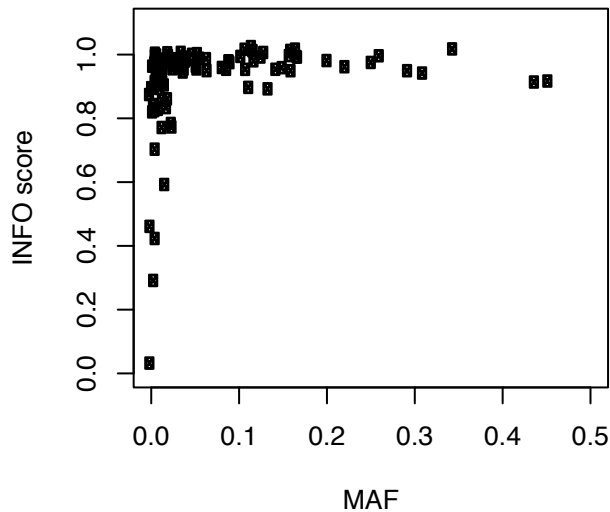

**4 digits HLA alleles**

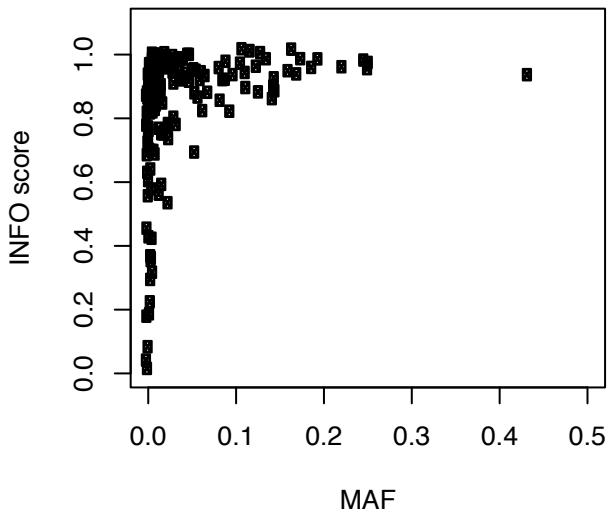

**Amino-acids**

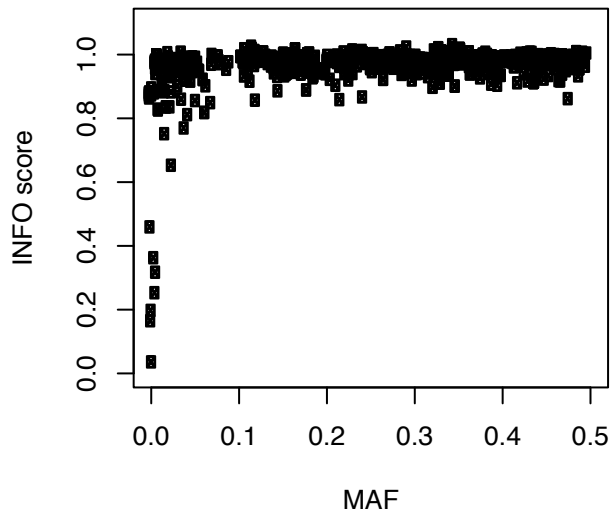

Supplement: S1 (10.1371/journal.pgen.1003926.s001) [file journal.pgen.1003926.s001.pdf › journal.pgen.1003926.s001.pdf]
