# Supplementary material for: Fine-Mapping the Genetic Association of the Major Histocompatibility Complex in Multiple Sclerosis: HLA and Non-HLA Effects
Source: PLOS journal article supplement (doi:10.1371/journal.pgen.1003926), 2013-11-21

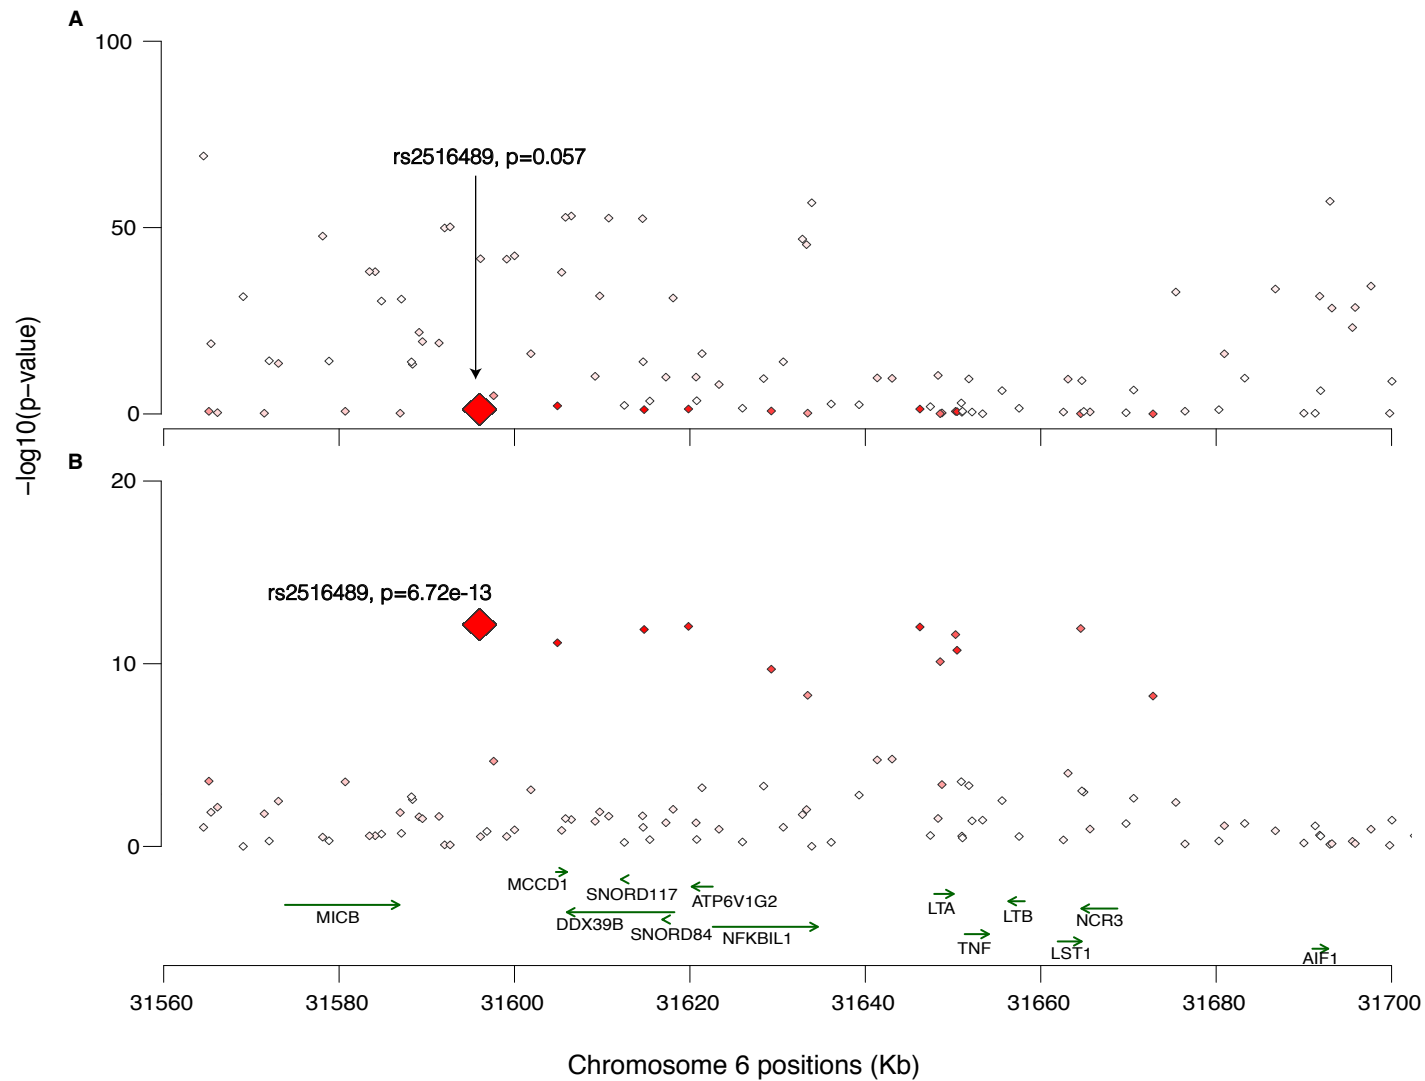

Supplement: S2 (10.1371/journal.pgen.1003926.s002) [file journal.pgen.1003926.s002.pdf › journal.pgen.1003926.s002.pdf]
