# Supplementary material for: Fine-Mapping the Genetic Association of the Major Histocompatibility Complex in Multiple Sclerosis: HLA and Non-HLA Effects
Source: PLOS journal article supplement (doi:10.1371/journal.pgen.1003926), 2013-11-21
Supplement: S3 (10.1371/journal.pgen.1003926.s003) [file journal.pgen.1003926.s003]

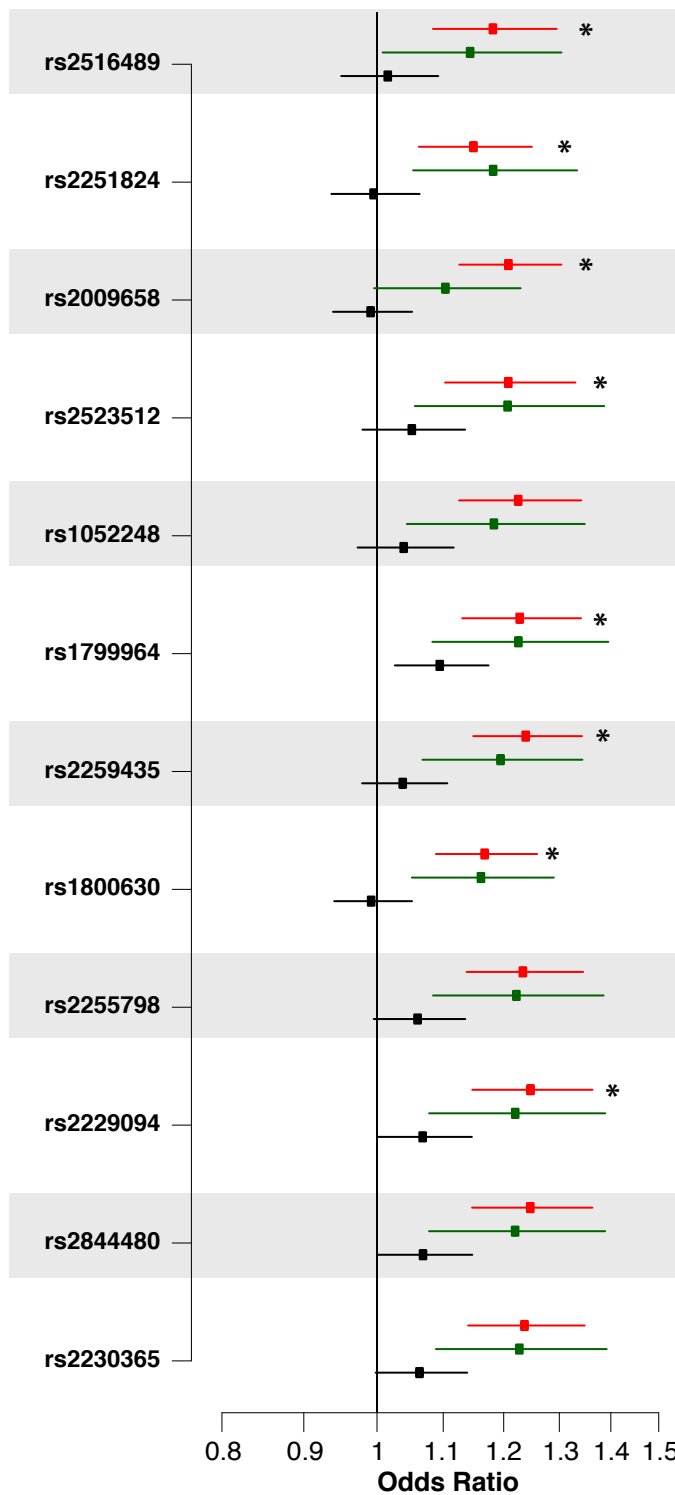

All samples  
 *DRB1\*15:01* carriers  
 *DRB1\*15:01* non-carriers
